# Supplementary material for: Perceived barriers to goals of care discussions in the emergency department: a multi-center analysis of hospitalist physicians
Source: Research Square preprint supplement (doi:10.21203/rs.3.rs-137260/v1), 2021-01-08
Supplement: Supplementary file 2 [file f9b8a572b172910fe8dc809c.docx]

**Conducting Goals of Care in the ED – Internal Medicine Staff Survey**

The following is intended to better understand Internal Medicine (IM) physicians’ perception and experience with engaging in goals of care (GOC) discussions in the Emergency Department (ED). We greatly appreciate your input!

**In the past year, how often have you (or your team) had goals of care discussions with patients (or their substitute decision maker) in the ED?**

Every day  Several per month  Once per month  A few times per year  Almost never

**For a patient who requires hospital admission, who do you see as the most appropriate service to carry out a goals of care discussion with the patient/family (select one)?:**

Myself  My Resident  Palliative Care  Emergency Medicine  Family Doctor  Admitting Service  Other, specify:

**Do you (or your team) find it difficult to initiate a GOC discussion in the ED? If YES, what do you find most challenging about having these discussions in the ED?**

Always  Almost always  Sometimes  Almost never  Never

**What do you (or your team) find most challenging about having these discussions in the ED?**

| **My team (ie: residents, fellows):** | *Never* | *Almost Never* | *Sometimes* | *Almost Always* | *Always* |
| --- | --- | --- | --- | --- | --- |
| is able to **access comprehensive patient records** before conductinggoals of care discussions in the ED. | 1 | 2 | 3 | 4 | 5 |
| has **effective prognostic tools** for patients with ***non-cancer-related* terminal disease** available to them before conducting goals of care discussions in the ED. | 1 | 2 | 3 | 4 | 5 |
| has **sufficient time** to communicate with patients/families regarding their goals of care in the ED. | 1 | 2 | 3 | 4 | 5 |
| recognizes that patients from a **long-term care facility** have their **advanced directives document readily available** in the ED. | 1 | 2 | 3 | 4 | 5 |
| **feels comfortable** having goals of care discussions in the ED. | 1 | 2 | 3 | 4 | 5 |
| is able to **contact a patient’s family/SDM** before conducting goals of care discussions in the ED. | 1 | 2 | 3 | 4 | 5 |
| is able to **communicate with the patient’s healthcare providers** before having goals of care discussions in the ED. | 1 | 2 | 3 | 4 | 5 |
| recognizes that **conflict between family and patient health care wishes** interfere with conducting goals of care discussions in the ED. | 1 | 2 | 3 | 4 | 5 |
|  | *Strongly Disagree* | *Disagree* | *Neutral* | *Agree* | *Strongly Agree* |
| Patients or their families are **ready and willing to participate** in goals of care discussion in the ED. | 1 | 2 | 3 | 4 | 5 |
| My team (residents and fellows**) lack the adequate training** to conduct goals of care discussions. | 1 | 2 | 3 | 4 | 5 |
| My team believes it is more challenging to have goals of care discussions in the ED once **aggressive medical treatment has been initiated**. | 1 | 2 | 3 | 4 | 5 |
| Goals of care discussions are **not my scope of practice** as an internal medicine physician. | 1 | 2 | 3 | 4 | 5 |
| My team **feel’s more comfortable** having goals of care discussions for **patients with cancer** versus patients with non-cancer related terminal illness. | 1 | 2 | 3 | 4 | 5 |
| **Prognostic tools are more effective for patients with cancer** than those with non-cancer-related terminal illness. | 1 | 2 | 3 | 4 | 5 |
| The **working environment** is conducive to having goals of care discussions in the ED. | 1 | 2 | 3 | 4 | 5 |
| The **availability of Palliative Care 24 hours per day** would facilitate the ability to conduct goals of care discussions in the ED. | 1 | 2 | 3 | 4 | 5 |
| Because patients from of a long-term care facility are **mandated to have an advance directive**, goals of care discussions in the ED **are unnecessary for these patients.** | 1 | 2 | 3 | 4 | 5 |

**Please tell us about yourself:**

**Gender:**  Male  Female

**Years of practice as an Internal Medicine Staff:** ___________________________**Current Subspecialty:** ___________________

**Hospital sites in Toronto worked at in past year:**  SMH  MSH  UHN  Sunnybrook  Other, _______________

NYGH  TEGH
